# Supplementary material for: Effect of Blueberry Supplementation on a Diet-Induced Rat Model of Prediabetes—Focus on Hepatic Lipid Deposition, Endoplasmic Stress Response and Autophagy
Source: MDPI journal article supplement (doi:10.3390/nu16040513), 2024-02-13
Supplement: s1 [file s1]

## Supplementary Data

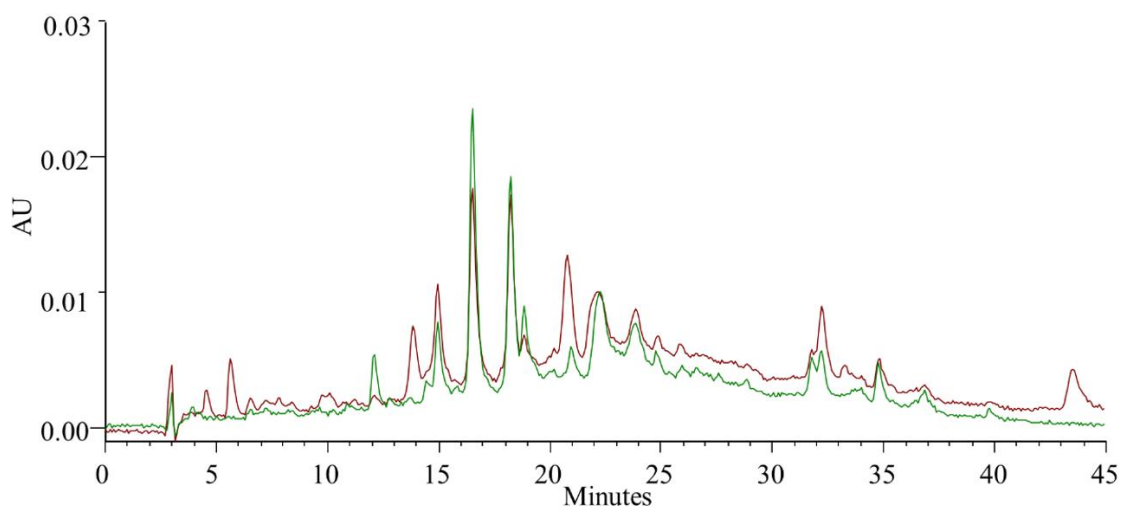

**Figure S1: Chromatographic profile of phenolic compounds in BJ, obtained with HPLC-PDA (320 / 530 nm).** Liquid chromatograph with a photodiode spectrophotometer-PDA detector (Thermo Finnigan Surveyor, San Diego, CA, USA) interfaced with a linear ion trap mass spectrometer (LIT-MS) (LTQ XL, Thermo Scientific, Waltham, MA, USA). The sample was injected on a Spherisorb ODS-2 column (150x2.1 mm id; particle size, 3  $\mu\text{m}$ ; Waters Corp., Milford, MA, USA) with a Spherisorb ODS-2 guard cartridge (10x4.6 mm id; particle size, 5  $\mu\text{m}$ ; Waters Corp., Milford, MA, USA) at 25  $^{\circ}\text{C}$ .

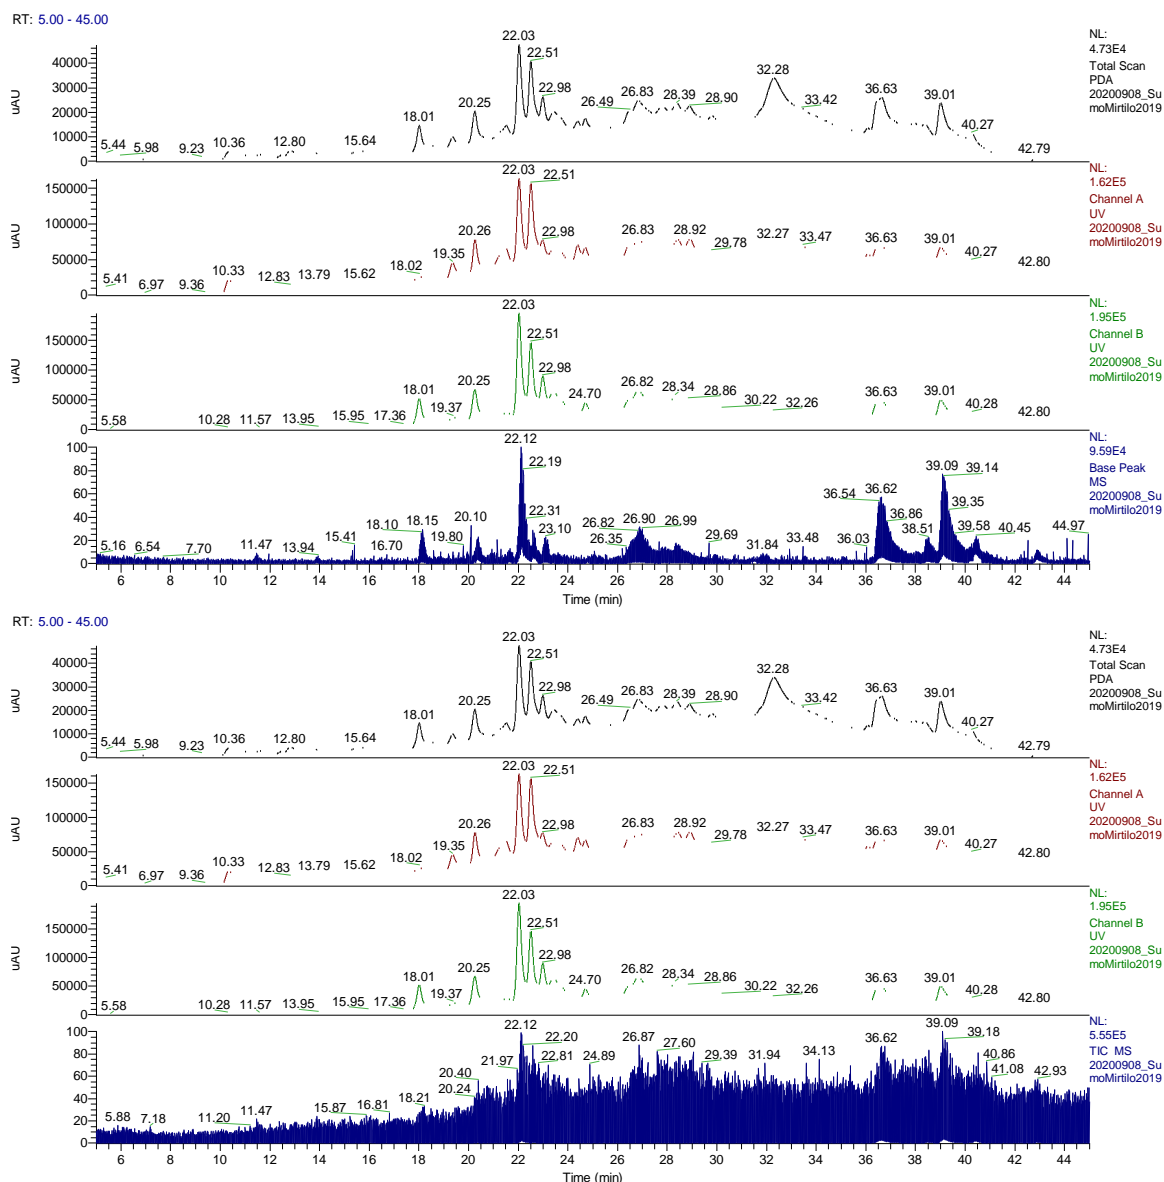

**Figure S2: Chromatograms of PDA, UV (channel A, 280nm and channel B, 320nm) and MS (TIC).** The elution was performed using 1% aqueous formic acid (v/v) (A) and methanol (B) as mobile phase, with a gradient profile of 0–75 min (0%–100% B), at a flow rate of 200  $\mu\text{Lmin}^{-1}$ . The PDA detection was recorded in a wavelength range of 200–600 nm, followed by the detection in the mass spectrometer. Mass spectra were acquired in a negative ion mode. The mass spectrometer performed three consecutive scans: Full mass ( $m/z$  100–2000), MS2 of the most abundant ion in the full mass, and MS3 of the most abundant ion in the MS2. Source and capillary voltage were 5.0 kV and -35.0 V, respectively. Capillary temperature was 275°C. Nitrogen was used as sheath and auxiliary gas at 40 and 5 Finnigan arbitrary units, respectively, and helium as collision gas with a normalized energy of 35%. Data treatment was carried out with the XCALIBUR software (Thermo Scientific, Waltham, MA, USA).

**Table S1: Compounds identified in BJ by HPLC-PDA-ESI-MS<sup>n</sup>.**

| Peak | R <sub>t</sub><br>(min) | λ <sub>máx</sub><br>(nm)           | ESI-MS <sup>n</sup> [ <i>m/z</i> (relative abundance, %)] |                                                                                                            |                                                                                               | Attempt to<br>identify<br>(reference)                                             |
|------|-------------------------|------------------------------------|-----------------------------------------------------------|------------------------------------------------------------------------------------------------------------|-----------------------------------------------------------------------------------------------|-----------------------------------------------------------------------------------|
|      |                         |                                    | Precursor<br>Ion [M-H] <sup>-</sup>                       | MS <sup>2</sup>                                                                                            | MS <sup>3</sup>                                                                               |                                                                                   |
| 1    | 13.85                   | 223, 261                           | 315 (100)                                                 | 153 (100)                                                                                                  | 123 (100)                                                                                     | <b>Protocatechuic acid hexose</b><br>(Fang, Yu e Prior, 2002)                     |
| 2    | 18.01                   | 222, 251sh, 260, 329               | 355 (100)                                                 | 247 (11), 235 (11), 207 (16), <b>193</b> (100), 192 (32), 165 (10)                                         | 165 (100)                                                                                     | <b>Ferulic acid hexose</b><br>(Fang, Yu e Prior, 2002)                            |
| 3    | 20.25                   | 222, 246, 286, 291sh, 299sh, 321sh | 341                                                       | 179 (100)                                                                                                  | 135 (100)                                                                                     | <b>Caffeic acid hexose</b><br>(Fang, Yu e Prior, 2002)                            |
| 4    | 21.46                   | 222, 249, 286, 299sh, 332sh        | 341                                                       | 179 (100)                                                                                                  | 135 (100)                                                                                     | <b>Caffeic acid hexose</b><br>(Fang, Yu e Prior, 2002)                            |
| 5    | 22.03                   | 222, 240, 291sh, 301sh, 313        | 341                                                       | 179 (100)                                                                                                  | 135 (100)                                                                                     | <b>Caffeic acid hexose</b><br>(Fang, Yu e Prior, 2002)                            |
| 6    | 22.51                   | 222, 243, 291, 229sh, 317sh        | 401                                                       | 355 (100), 193 (16)                                                                                        | 193 (100)                                                                                     | <b>Ferulic acid hexose</b><br>(Fang, Yu e Prior, 2002)                            |
| 7    | 22.98                   | 220, 246, 291sh, 299sh, 323        | 355                                                       | 217 (48), <b>193</b> (100), 175 (20)                                                                       | 178 (27), 149 (54), <b>134</b> (100)                                                          | <b>Ferulic acid hexose</b><br>(Fang, Yu e Prior, 2002)                            |
| 8    | 23.44                   | 222, 247, 291, 299sh, 318          | 353                                                       | 295 (20), <b>191</b> (100)                                                                                 | 173 (53), 171 (23), 155 (17), <b>127</b> (100), 111 (33), 109 (27), 93 (24), 87 (15), 85 (47) | <b>5-CQA</b><br>(Clifford, Knight e Kuhnert, 2005)                                |
| 9    | 24.39                   | 222, 249sh, 273, 298sh, 330sh      | 431                                                       | 385 (100), 223 (10)                                                                                        | 223 (100)                                                                                     | <b>Sinap acid hexoside</b><br>(Bujor <i>et al.</i> , 2016)                        |
| 10   | 26.3                    | 221, 248, 273, 299sh, 330sh        | 861                                                       | 843 (11), 699 (70), 681 (21), 669 (56), 533 (25), 509 (81), 507 (32), <b>353</b> (100), 351 (73), 345 (14) | 191 (100)                                                                                     | <b>Caffeoyl-hidroxydihidro-CQA derivative</b><br>(Matei, Jaiswal e Kuhnert, 2012) |
| 11   | 26.56                   | 221, 246, 280, 299sh, 327sh        | 861                                                       | 699 (35), 669 (40), 533 (45), 509 (56), 507 (26), <b>353</b> (100), 351 (42)                               | 191 (100)                                                                                     | <b>Caffeoyl-hidroxydihidro-CQA derivative</b><br>(Matei, Jaiswal e Kuhnert, 2012) |
| 12   | 26.83                   | 222, 245, 283,                     | 861                                                       | 699 (48), 695 (11), 669 (52), 533 (46),                                                                    | 191 (100)                                                                                     | <b>Caffeoyl-hidroxydihidro-CQA derivative</b>                                     |

| Peak      | R <sub>t</sub><br>(min) | λ <sub>max</sub><br>(nm)             | ESI-MSn <sup>a</sup> [ <i>m/z</i> (relative abundance, %)] |                                                                                                                                                                         |                                                                                   | Attempt to<br>identify<br>(reference)                                                                  |
|-----------|-------------------------|--------------------------------------|------------------------------------------------------------|-------------------------------------------------------------------------------------------------------------------------------------------------------------------------|-----------------------------------------------------------------------------------|--------------------------------------------------------------------------------------------------------|
|           |                         |                                      | Precursor<br>Ion [M-H] <sup>-</sup>                        | MS <sup>2</sup>                                                                                                                                                         | MS <sup>3</sup>                                                                   |                                                                                                        |
|           |                         | 299sh,<br>325sh                      |                                                            | 509 (72), 507 (38),<br><b>353</b> (100), 351 (78)                                                                                                                       |                                                                                   | (Matei, Jaiswal e<br>Kuhnert, 2012)                                                                    |
| <b>13</b> | 27.77                   | 222, 246,<br>280,<br>299sh,<br>323sh | <b>861</b>                                                 | 843 (47), 699 (35),<br>695 (10), 681 (17),<br>669 (68), 651 (58),<br>583 (19), 533 (28),<br>509 (59), 507 (41),<br>489 (17), <b>353</b><br>(100), 351 (52),<br>345 (10) | <b>191</b> (100)                                                                  | <b>Caffeoyl-<br/>hidroxydihidro-<br/>CQA derivative</b><br>(Matei, Jaiswal e<br>Kuhnert, 2012)         |
| <b>14</b> | 28.39                   | 221, 246,<br>274,<br>299sh,<br>328sh | <b>861</b>                                                 | 829 (23), 699 (40),<br>681 (15), 669 (41),<br>533 (41), 515 (13),<br>509 (44), 507 (23),<br><b>353</b> (100), 351<br>(40), 345 (14)                                     | <b>191</b> (100)                                                                  | <b>Caffeoyl-<br/>hidroxydihidro-<br/>CQA derivative</b><br>(Matei, Jaiswal e<br>Kuhnert, 2012)         |
| <b>15</b> | 28.90                   | 221, 247,<br>276,<br>299sh,<br>327sh | <b>831</b>                                                 | 699 (46), 639 (35),<br>533 (35), 507 (25),<br>489 (10), 479 (45),<br><b>353</b> (100), 351<br>(57), 345 (14)                                                            | <b>191</b> (100)                                                                  | <b>Caffeoyl-<br/>hidroxydihidro-<br/>CQA derivative</b><br>(Matei, Jaiswal e<br>Kuhnert, 2012)         |
| <b>16</b> | 32.28                   | 222, 246,<br>283                     | <b>509</b>                                                 | <b>463</b> (100)                                                                                                                                                        | <b>331</b> (100),<br>161 (22)                                                     | <b>Laricitrin-O-<br/>pentoside</b><br>(Lätti <i>et al.</i> , 2010)                                     |
| <b>17</b> | 36.63                   | 220, 252,<br>267sh,<br>287sh,<br>349 | <b>463</b>                                                 | <b>301</b> (100)                                                                                                                                                        | 273 (13), 257<br>(14), <b>179</b><br>(100), 151<br>(59)                           | <b>Quercetin-O-<br/>hexoside</b><br>(Lätti <i>et al.</i> , 2010)                                       |
| <b>18</b> | 37.95                   | 251,<br>270sh,<br>336, 530           | <b>433</b>                                                 | <b>301</b> (100)                                                                                                                                                        | 273 (19), 272<br>(18), 257<br>(15), 256<br>(10), <b>179</b><br>(100), 151<br>(71) | <b>Quercetin-O-<br/>pentoside</b><br>(Lätti <i>et al.</i> , 2010)                                      |
| <b>19</b> | 37.95                   | 251,<br>270sh,<br>336, 530           | ---                                                        | ---                                                                                                                                                                     | ---                                                                               | <b>Malvidin<br/>derivative</b><br>(Howard <i>et al.</i> ,<br>2016)                                     |
| <b>20</b> | 38.36                   | 252,<br>268sh,<br>343,<br>531sh      | <b>433</b>                                                 | <b>301</b> (100)                                                                                                                                                        | 273 (15), <b>179</b><br>(100), 151<br>(74)                                        | <b>Quercetin -O-<br/>pentoside</b><br>(Lätti <i>et al.</i> , 2010)                                     |
| <b>21</b> | 38.36                   | 252,<br>268sh,<br>343,<br>531sh      | ---                                                        | ---                                                                                                                                                                     | ---                                                                               | <b>Delphinidin<br/>derivative</b><br>(Howard <i>et al.</i> ,<br>2016)                                  |
| <b>22</b> | 39.01                   | 220, 254,<br>266sh,<br>299sh,<br>347 | <b>447</b>                                                 | <b>301</b> (100)                                                                                                                                                        | 283 (12), 273<br>(19), <b>179</b><br>(100), 151<br>(71)                           | <b>Quercetin - O-<br/>deoxyhexoside</b><br>(Lätti <i>et al.</i> , 2010)                                |
| <b>23</b> | 40.27                   | 253,<br>269sh,<br>299sh,<br>349      | <b>623</b>                                                 | <b>315</b> (100), 300 (19)                                                                                                                                              | <b>300</b> (100)                                                                  | <b>Isorhamnetin -<br/>hexose-<br/>deoxyhexoside</b><br>(Simirgiotis e<br>Schmeda-<br>Hirschmann, 2010) |

| Peak | R <sub>t</sub><br>(min) | λ <sub>máx</sub><br>(nm)        | ESI-MSn <sup>a</sup> [ <i>m/z</i> (relative abundance, %)] |                 |                 | Attempt to<br>identify<br>(reference)               |
|------|-------------------------|---------------------------------|------------------------------------------------------------|-----------------|-----------------|-----------------------------------------------------|
|      |                         |                                 | Precursor<br>Ion [M-H] <sup>-</sup>                        | MS <sup>2</sup> | MS <sup>3</sup> |                                                     |
| 24   | 42.79                   | 252,<br>268sh,<br>343,<br>531sh | ---                                                        | ---             | ---             | <b>Malvidin</b><br>(Howard <i>et al.</i> ,<br>2016) |

Identification based on the UV-Vis spectra, the molecular weight and the fragmentation patterns, which are according to authors. The base peaks in MS spectra are in bold.

## **Bibliography**

1. BUJOR, Oana Crina *et al.* - Seasonal variations of the phenolic constituents in bilberry (*Vaccinium myrtillus* L.) leaves, stems and fruits, and their antioxidant activity. **Food Chemistry**. . ISSN 18737072. 213:2016) 58–68. doi: 10.1016/j.foodchem.2016.06.042.
2. CLIFFORD, Michael N. *et al.* - Hierarchical Scheme for LC-MS n Identification of Chlorogenic Acids. 2003). doi: 10.1021/jf026187q.
3. CLIFFORD, Michael N.; KNIGHT, Susan; KUHNERT, Nikolai - Discriminating between the six isomers of dicaffeoylquinic acid by LC-MSn. **Journal of Agricultural and Food Chemistry**. . ISSN 00218561. 53:10 (2005) 3821–3832. doi: 10.1021/jf050046h.
4. CLIFFORD, Michael N.; KNIGHT, Susan; KUHNERT, Nikolai - Discriminating between the Six Isomers of Dicaffeoylquinic Acid by LC-MS n. 2005). doi: 10.1021/jf050046h.
5. FANG, Nianbai; YU, Shangong; PRIOR, Ronald L. - LC/MS/MS characterization of phenolic constituents in dried plums. **Journal of Agricultural and Food Chemistry**. . ISSN 00218561. 50:12 (2002) 3579–3585. doi: 10.1021/jf0201327.
6. HOWARD, Luke R. *et al.* - Improved stability of blueberry juice anthocyanins by acidification and refrigeration. **Journal of Berry Research**. . ISSN 18785123. 6:2 (2016) 189–201. doi: 10.3233/JBR-160133.
7. LÄTTI, Anja K. *et al.* - Anthocyanin and flavonol variation in bog bilberries (*Vaccinium uliginosum* L.) in Finland. **Journal of Agricultural and Food Chemistry**. . ISSN 00218561. 58:1 (2010) 427–433. doi: 10.1021/jf903033m.
8. MATEI, Marius Febi; JAISWAL, Rakesh; KUHNERT, Nikolai - Investigating the chemical changes of chlorogenic acids during coffee brewing: Conjugate addition of water to the olefinic moiety of chlorogenic acids and their quinides. **Journal of Agricultural and Food Chemistry**. . ISSN 00218561. 60:49 (2012) 12105–12115. doi: 10.1021/jf3028599.
9. SIMIRGIOTIS, M. J.; SCHMEDA-HIRSCHMANN, G. - Direct identification of phenolic constituents in Boldo Folium (*Peumus boldus* Mol.) infusions by high-performance liquid chromatography with diode array detection and electrospray ionization tandem mass spectrometry. **Journal of Chromatography A**. . ISSN 00219673. 1217:4 (2010) 443–449. doi: 10.1016/j.chroma.2009.11.014.
